# Supplementary material for: Serum Vitamin D Concentration Does Not Predict Insulin Action or Secretion in European Subjects With the Metabolic Syndrome
Source: PubMed Central journal article supplement — Diabetes Care. 2010 Jan 12;33(4):923–5. doi: 10.2337/dc09-1692 (PMC2845053; doi:10.2337/dc09-1692), 2010-01-12
Supplement: supp_dc09-1692_dc09-1692_Online_Only_Appendix_.pdf [file supp_dc09-1692_dc09-1692_Online_Only_Appendix_.pdf]

Online Appendix Table 1. Characteristics of study participants

|                                             | Tertiles of 25-hydroxyvitamin D3 (nmol/l) |                   |                  | P       |
|---------------------------------------------|-------------------------------------------|-------------------|------------------|---------|
|                                             | T1<br>< 41.9                              | T2<br>≥41.9 -63.1 | T3<br>≥ 63.1     |         |
| <i>N</i>                                    | 149                                       | 148               | 149              |         |
| Age (years)                                 | 53 ± 8.9                                  | 55 ± 8.7          | 56 ± 9.2         | < 0.001 |
| Sex, males                                  | 63 (42.3)                                 | 72 (48.6)         | 70 (47)          | 0.52    |
| Education (years)*                          |                                           |                   |                  | 0.14    |
| 0-6                                         | 6 (4.03)                                  | 9 (6.08)          | 5 (3.36)         |         |
| 7-9                                         | 82 (55)                                   | 86 (58.1)         | 87 (58.4)        |         |
| ≥ 10                                        | 58 (38.9)                                 | 50 (33.8)         | 49 (32.9)        |         |
| Smoking†                                    |                                           |                   |                  | 0.19    |
| Never                                       | 77 (51.7)                                 | 65 (43.9)         | 71 (47.7)        |         |
| Former                                      | 38 (25.5)                                 | 57 (38.5)         | 47 (31.5)        |         |
| Current                                     | 31 (20.8)                                 | 23 (15.5)         | 24 (16.1)        |         |
| Drinking alcohol, yes‡                      | 96 (64.4)                                 | 101 (68.2)        | 120 (80.5)       | < 0.001 |
| Physical Activity Level (AU)‡               | 7.6 ± 1.3                                 | 7.7 ± 1.2         | 8.0 ± 1.2        | 0.034   |
| Energy intake (kcal)§                       | 2063 ± 648                                | 2159 ± 624        | 2090 ± 609       | 0.73    |
| Using vitamin supplements, yes              | 28 (18.8)                                 | 29 (19.6)         | 52 (34.9)        | 0.002   |
| Systolic blood pressure (mmHg)¶             | 140 ± 13.5                                | 139 ± 15.8        | 138 ± 14.8       | 0.29    |
| Diastolic blood pressure (mmHg)¶            | 86 ± 8.9                                  | 87 ± 9.2          | 86 ± 8.9         | 0.98    |
| Fasting glucose (mmol/l)                    | 5.8 (5.5–6.3)                             | 5.8 (5.4–6.4)     | 5.8 (5.5–6.3)    | 0.74    |
| Fasting triglycerides (mmol/l)              | 1.55 (1.1–2.15)                           | 1.58 (1.16–2.30)  | 1.63 (1.23–2.34) | 0.30    |
| Fasting HDLcholesterol (mmol/l)             | 1.05 (0.93–1.27)                          | 1.02 (0.91–1.20)  | 1.06 (0.88–0.28) | 0.41    |
| Waist circumference (cm)                    | 107 ± 11                                  | 107 ± 9.3         | 104 ± 12         | 0.028   |
| BMI (kg/m <sup>2</sup> )                    | 33 ± 4.2                                  | 33 ± 3.9          | 31 ± 4.2         | < 0.001 |
| BMI Category                                |                                           |                   |                  | 0.002   |
| Normal (BMI < 25 kg/m <sup>2</sup> )        | 4 (2.68)                                  | 0 (0)             | 8.0 (5.37)       |         |
| Overweight (BMI 25-29.9 kg/m <sup>2</sup> ) | 29 (19.5)                                 | 43 (29.1)         | 56 (37.6)        |         |
| Obese (BMI > 30 kg/m <sup>2</sup> )         | 116 (77.9)                                | 105 (71)          | 85 (57)          |         |
| Fat mass (kg)#                              | 34.8 (9.5)                                | 33.5 (8.1)        | 31.9 (9.2)       | 0.006   |

Values are mean ± SD, median (interquartile range), or n (%). Abbreviations: AU, arbitrary units; \**n*=432, †*n*= 433, ‡*n*=319 §*n*=421, ||*n*=439, ¶*n*=423 #*n*=426. Differences between groups were assessed by ANOVA or Kruskal-Wallis Test for continuous variables and the chi-square test for categorical variables.

Online Appendix Table 2. Parameters of insulin action and secretion across tertiles of vitamin 25(OH) D<sub>3</sub>.

|                                              | n   | Tertiles of 25-hydroxyvitamin D <sub>3</sub> (nmol/l) |                    |                  | P     |
|----------------------------------------------|-----|-------------------------------------------------------|--------------------|------------------|-------|
|                                              |     | T1<br><41.9                                           | T2<br>≥41.9 - 63.1 | T3<br>≥63.1      |       |
| Fasting insulin (μU/ml)                      | 446 | 10 (7.2–14.3)                                         | 9.5 (6.8–12.5)     | 8.2 (5.7–11.6)   | 0.013 |
| HOMA-IR                                      | 446 | 1.49 (1.11–2.14)                                      | 1.49 (1.04–1.90)   | 1.28 (0.87–1.80) | 0.015 |
| HOMA B (%)                                   | 446 | 86.3 (73.8–117)                                       | 84.6 (67.2–106)    | 76.8 (61.9–104)  | 0.013 |
| Si ((mU/l) <sup>-1</sup> min <sup>-1</sup> ) | 406 | 2.4 (1.6–3.5)                                         | 2.5 (1.7–3.2)      | 2.7 (1.8–3.7)    | 0.31  |
| AIR (mU l <sup>-1</sup> min <sup>-1</sup> )  | 406 | 315 (145–507)                                         | 278 (155–411)      | 255 (157–512)    | 0.41  |
| DI                                           | 406 | 748 (375–1196)                                        | 697 (260–1245)     | 712 (392–1203)   | 0.59  |

Values are given as medians (interquartile range). Abbreviations: 25(OH)vitamin D<sub>3</sub>, 25-hydroxyvitamin D<sub>3</sub>; HOMA-IR, homeostasis model assessment of insulin resistance; HOMA β, homeostasis model assessment of beta cell function; Si, insulin sensitivity index; AIR, acute insulin response; DI, disposition index. Differences between groups were assessed by Kruskal-Wallis Test for continuous variables.
